# Supplementary material
Source: PubMed Central journal article supplement (PMC3643015)
Supplement: NIHMS389882-supplement-supplemental.pdf [file NIHMS389882-supplement-supplemental.pdf]

**Supplemental Materials for “Measurement Error Case  
Series Models with Application to  
Infection-Cardiovascular Risk in Older Patients on  
Dialysis”**

## Additional simulation results

Here we provide results of bias when ignoring measurement error and bias-corrected estimation under uniform, normal and gamma distributed measurement error. See the corresponding manuscript for more details.

Tables 1-3 provide bias-correction results for risk/effect patterns (a)-(f) for each measurement error distribution.

Table 4 provides bias results for risk/effect pattern (a) with uniformly distributed measurement error as a function of sample size.

Table 5 provides bias-correction results for risk/effect pattern (a) with uniformly distributed measurement error as a function of measurement error variance.

Figures 1-6 provide bias results for risk/effect patterns (a)-(f) for each measurement error distribution as a function of  $\mu_u$ .

Table 1: Bias-corrected estimates  $\hat{\beta}$  and standard deviations over 200 replications for datasets (each with  $N = 1000$  and uniformly distributed measurement error) with three 30-day risk periods and for risk/effect patterns (a)-(f).

| Pattern | True ( $\beta_1$ ) | Est.  | SD    | True ( $\beta_2$ ) | Est.  | SD    | True ( $\beta_3$ ) | Est.  | SD    |
|---------|--------------------|-------|-------|--------------------|-------|-------|--------------------|-------|-------|
| a       | 1.099              | 1.106 | 0.129 | 0.693              | 0.688 | 0.151 | 0.405              | 0.387 | 0.172 |
| b       | 0.405              | 0.408 | 0.180 | 0.693              | 0.677 | 0.155 | 1.099              | 1.119 | 0.136 |
| c       | 0.693              | 0.685 | 0.158 | 1.099              | 1.095 | 0.117 | 0.693              | 0.685 | 0.164 |
| d       | 1.099              | 1.080 | 0.129 | 0.693              | 0.662 | 0.165 | 1.099              | 1.103 | 0.132 |
| e       | 0.693              | 0.686 | 0.161 | 0.693              | 0.683 | 0.161 | 0.693              | 0.703 | 0.166 |
| f       | 1.099              | 1.102 | 0.136 | 0.405              | 0.399 | 0.176 | 0.693              | 0.689 | 0.166 |

Table 2: Bias-corrected estimates  $\hat{\beta}$  and standard deviations over 200 replications for datasets (each with  $N = 1000$  and normally distributed measurement error) with three 30-day risk periods and for risk/effect patterns (a)-(f).

| Pattern | True ( $\beta_1$ ) | Est.  | SD    | True ( $\beta_2$ ) | Est.  | SD    | True ( $\beta_3$ ) | Est.  | SD    |
|---------|--------------------|-------|-------|--------------------|-------|-------|--------------------|-------|-------|
| a       | 1.099              | 1.112 | 0.137 | 0.693              | 0.692 | 0.153 | 0.405              | 0.413 | 0.165 |
| b       | 0.405              | 0.391 | 0.189 | 0.693              | 0.692 | 0.142 | 1.099              | 1.084 | 0.128 |
| c       | 0.693              | 0.675 | 0.170 | 1.099              | 1.099 | 0.119 | 0.693              | 0.698 | 0.145 |
| d       | 1.099              | 1.117 | 0.144 | 0.693              | 0.708 | 0.162 | 1.099              | 1.110 | 0.135 |
| e       | 0.693              | 0.689 | 0.153 | 0.693              | 0.706 | 0.163 | 0.693              | 0.716 | 0.151 |
| f       | 1.099              | 1.117 | 0.130 | 0.405              | 0.395 | 0.184 | 0.693              | 0.695 | 0.166 |

Table 3: Bias-corrected estimates  $\hat{\beta}$  and standard deviations over 200 replications for datasets (each with  $N = 1000$  and gamma distributed measurement error) with three 30-day risk periods and for risk/effect patterns (a)-(f).

| Pattern | True ( $\beta_1$ ) | Est.  | SD    | True ( $\beta_2$ ) | Est.  | SD    | True ( $\beta_3$ ) | Est.  | SD    |
|---------|--------------------|-------|-------|--------------------|-------|-------|--------------------|-------|-------|
| a       | 1.099              | 1.100 | 0.136 | 0.693              | 0.694 | 0.166 | 0.405              | 0.428 | 0.179 |
| b       | 0.405              | 0.395 | 0.157 | 0.693              | 0.690 | 0.140 | 1.099              | 1.096 | 0.133 |
| c       | 0.693              | 0.668 | 0.156 | 1.099              | 1.108 | 0.130 | 0.693              | 0.681 | 0.139 |
| d       | 1.099              | 1.094 | 0.142 | 0.693              | 0.689 | 0.162 | 1.099              | 1.088 | 0.130 |
| e       | 0.693              | 0.698 | 0.154 | 0.693              | 0.682 | 0.151 | 0.693              | 0.696 | 0.152 |
| f       | 1.099              | 1.114 | 0.126 | 0.405              | 0.389 | 0.199 | 0.693              | 0.692 | 0.152 |

Table 4: Bias-corrected estimates  $\hat{\beta}$  and standard deviations over 200 replications for datasets with uniformly distributed measurement error with three 30-day risk periods and for risk/effect pattern (a) and increasing sample size  $N$ .

| <b>N</b> | <b>True (<math>\beta_1</math>)</b> | <b>Est.</b> | <b>SD</b> | <b>True (<math>\beta_2</math>)</b> | <b>Est.</b> | <b>SD</b> | <b>True (<math>\beta_3</math>)</b> | <b>Est.</b> | <b>SD</b> |
|----------|------------------------------------|-------------|-----------|------------------------------------|-------------|-----------|------------------------------------|-------------|-----------|
| 100      | 1.099                              | 1.121       | 0.440     | 0.693                              | 0.601       | 0.527     | 0.405                              | 0.388       | 0.674     |
| 200      | 1.099                              | 1.101       | 0.299     | 0.693                              | 0.686       | 0.357     | 0.405                              | 0.345       | 0.406     |
| 400      | 1.099                              | 1.115       | 0.227     | 0.693                              | 0.715       | 0.235     | 0.405                              | 0.414       | 0.292     |
| 600      | 1.099                              | 1.113       | 0.163     | 0.693                              | 0.674       | 0.219     | 0.405                              | 0.462       | 0.222     |
| 800      | 1.099                              | 1.107       | 0.147     | 0.693                              | 0.697       | 0.170     | 0.405                              | 0.416       | 0.204     |
| 1000     | 1.099                              | 1.106       | 0.129     | 0.693                              | 0.688       | 0.151     | 0.405                              | 0.387       | 0.172     |

Table 5: Bias-correction for increasing variance of the distribution of exposure onset measurement error (Uniform) with  $\mu_u = 8$ . Values are averages of estimates  $\hat{\beta}$  and mean square error (MSE) from 200 replications for datasets (each with  $N = 1000$ ) with three 30-day risk periods and for risk/effect patterns (a).

| $\sigma_u^2$ | $\beta_1$ (1.0986) |        | $\beta_2$ (0.6931) |        | $\beta_3$ (0.4055) |        |
|--------------|--------------------|--------|--------------------|--------|--------------------|--------|
|              | Estimate           | MSE    | Estimate           | MSE    | Estimate           | MSE    |
| 0.33         | 1.1298             | 0.0553 | 0.6671             | 0.0748 | 0.4013             | 0.1157 |
| 3.00         | 1.0927             | 0.0686 | 0.7007             | 0.0836 | 0.4251             | 0.1234 |
| 8.33         | 1.1041             | 0.0557 | 0.7081             | 0.0587 | 0.4104             | 0.1103 |
| 16.33        | 1.1020             | 0.0605 | 0.6925             | 0.0684 | 0.4243             | 0.1149 |

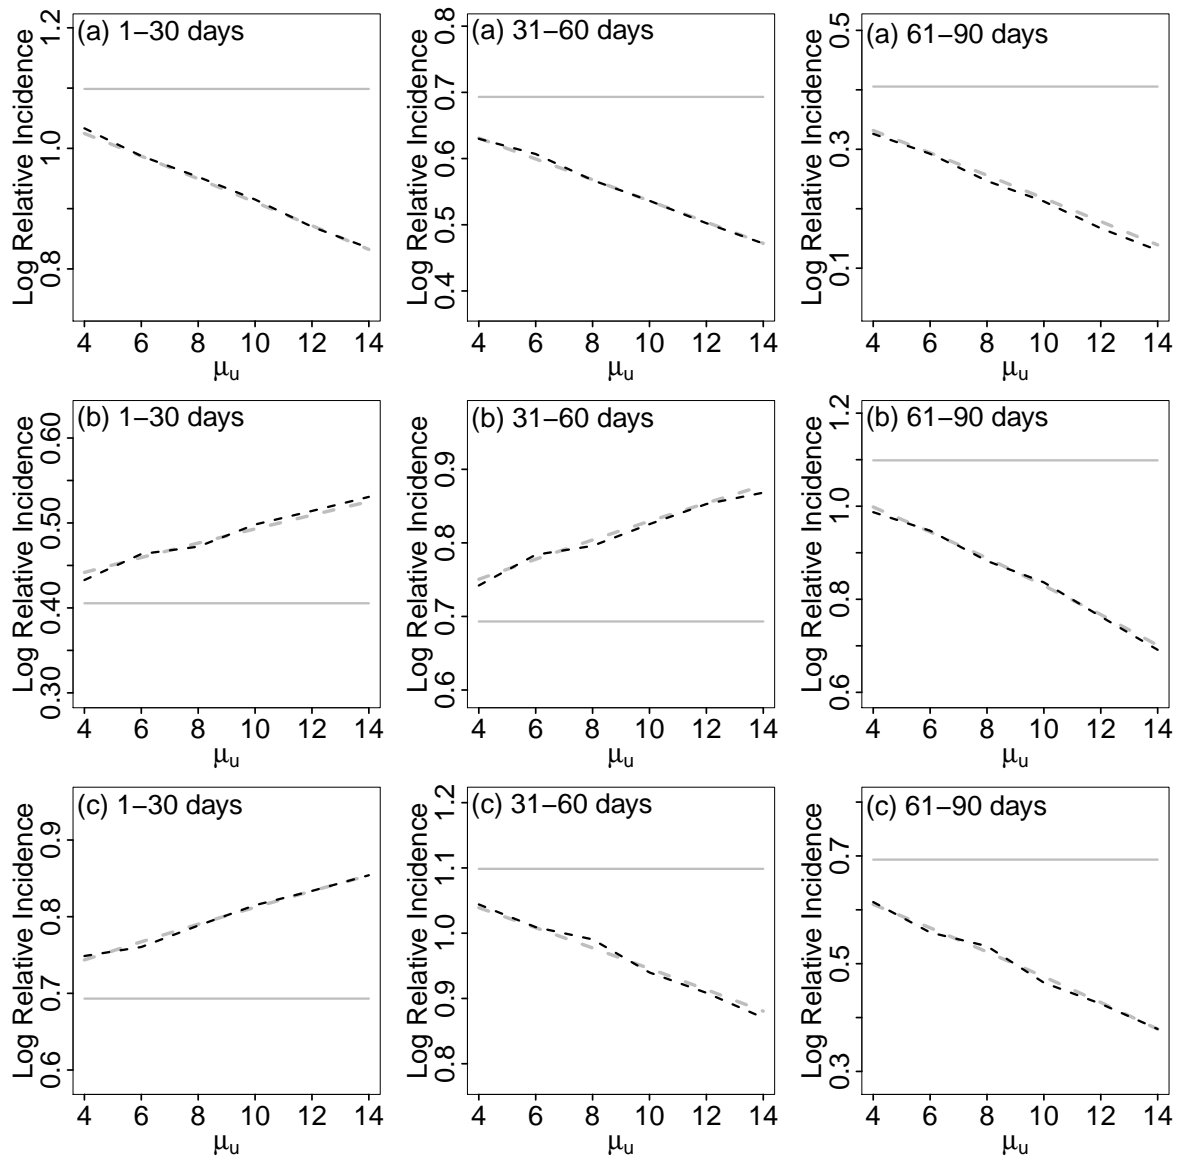

Figure 1: Characterization of bias for uniformly distributed measurement error for risk/effect patterns (a)-(c). Bias for true patterns of log relative incidence  $\beta$  (indicated by horizontal lines) over three risk periods. Dashed black curves denote naive case series estimates ignoring measurement error, which targets  $\beta^*$  (dashed gray curves) instead of  $\beta$ . Given are averages over 200 simulated data sets.

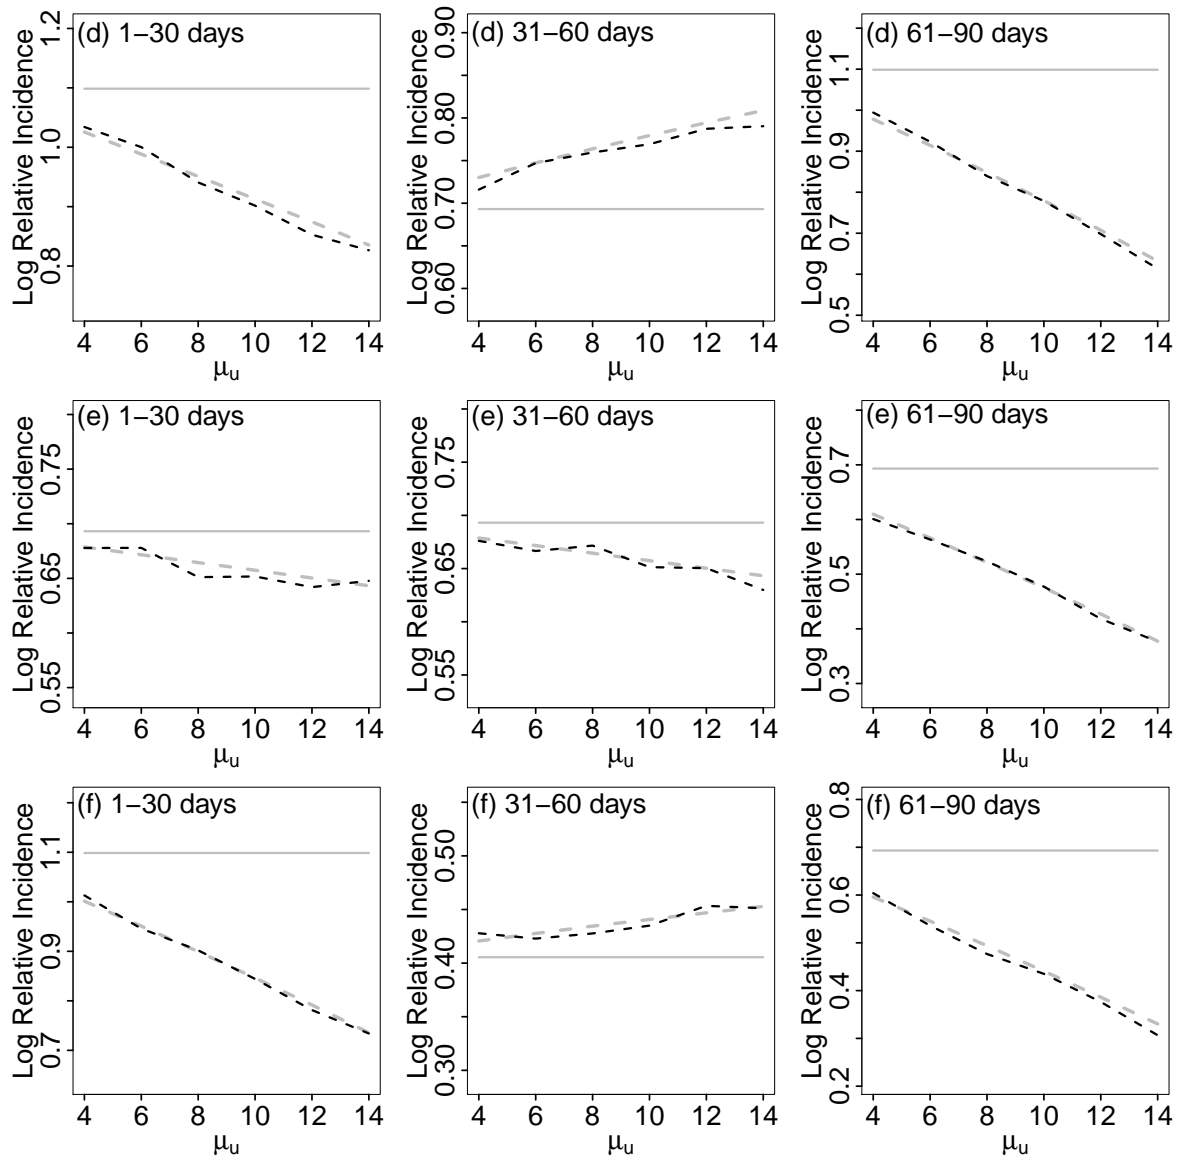

Figure 2: Characterization of bias for uniformly distributed measurement error for risk/effect patterns (d)-(f). Bias for true pattern of log relative incidence  $\beta$  (indicated by horizontal lines) over three risk periods. Dashed black curves denote naive case series estimates ignoring measurement error, which targets  $\beta^*$  (dashed gray curves) instead of  $\beta$ . Given are averages over 200 simulated data sets.

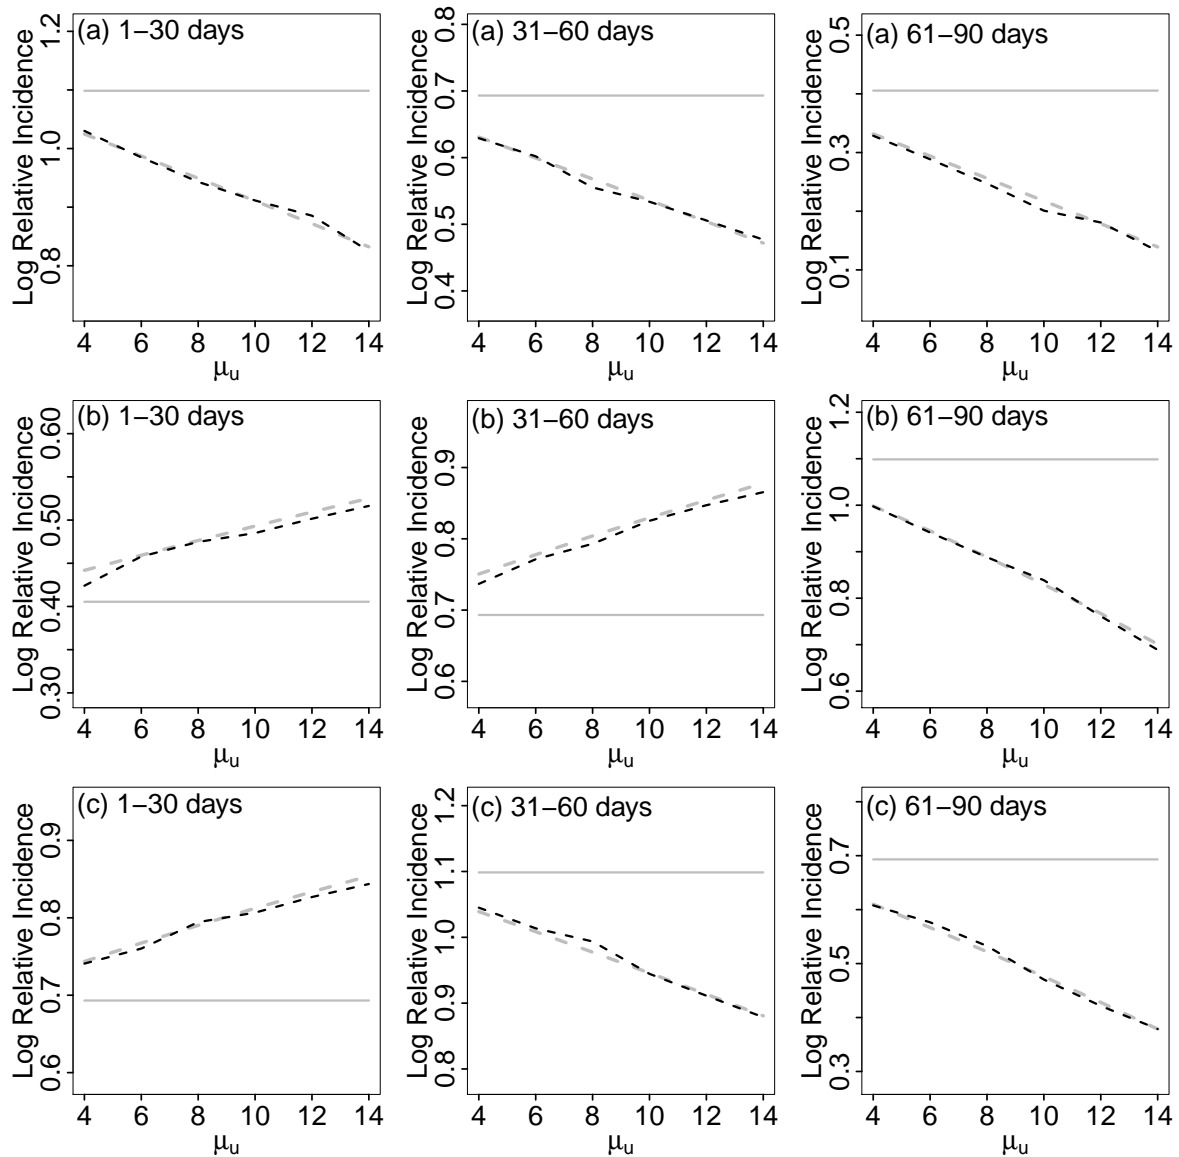

Figure 3: Characterization of bias for normally distributed measurement error for risk/effect patterns (a)-(c). Bias for true patterns of log relative incidence  $\beta$  (indicated by horizontal lines) over three risk periods. Dashed black curves denote naive case series estimates ignoring measurement error, which targets  $\beta^*$  (dashed gray curves) instead of  $\beta$ . Given are averages over 200 simulated data sets.

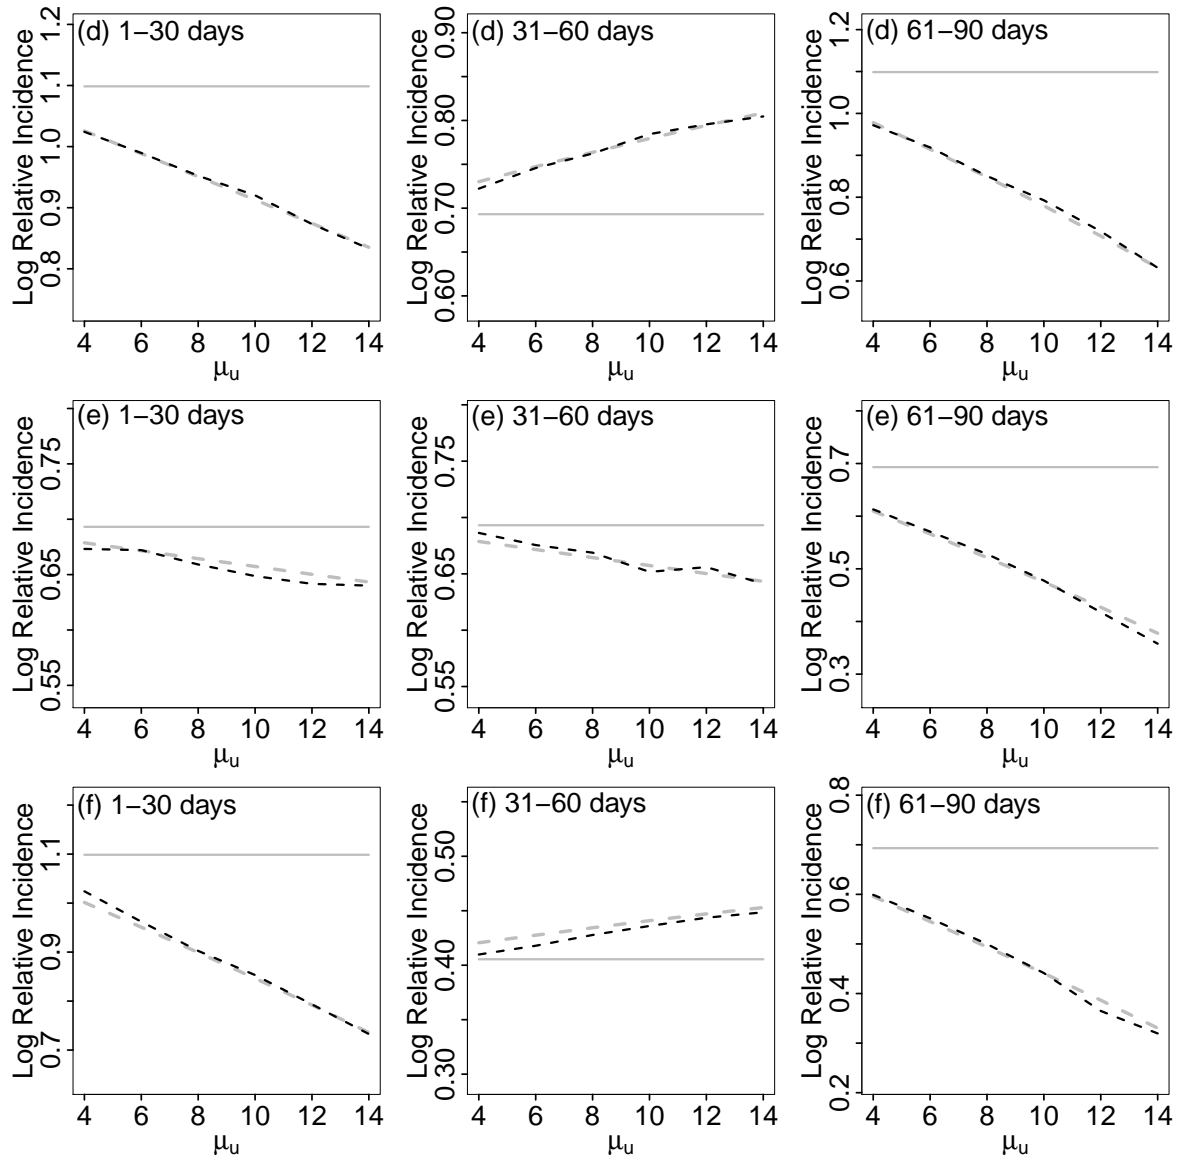

Figure 4: Characterization of bias for normally distributed measurement error for risk/effect patterns (d)-(f). Bias for true patterns of log relative incidence  $\beta$  (indicated by horizontal lines) over three risk periods. Dashed black curves denote naive case series estimates ignoring measurement error, which targets  $\beta^*$  (dashed gray curves) instead of  $\beta$ . Given are averages over 200 simulated data sets.



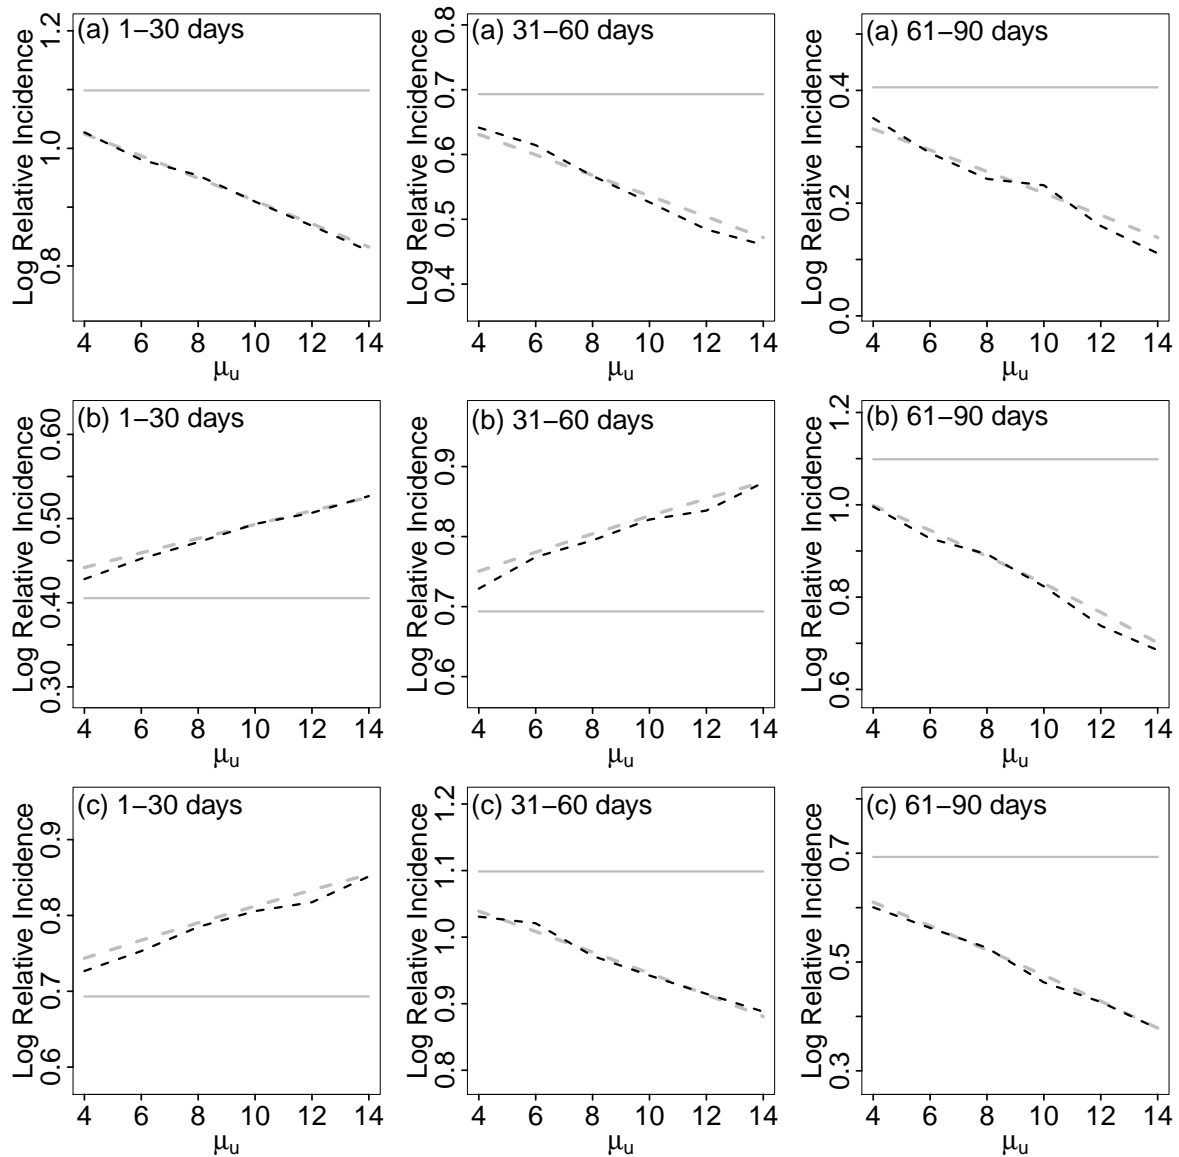

Figure 5: Characterization of bias for gamma distributed measurement error for risk/effect patterns (a)-(c). Bias for true patterns of log relative incidence  $\beta$  (indicated by horizontal lines) over three risk periods. Dashed black curves denote naive case series estimates ignoring measurement error, which targets  $\beta^*$  (dashed gray curves) instead of  $\beta$ . Given are averages over 200 simulated data sets.

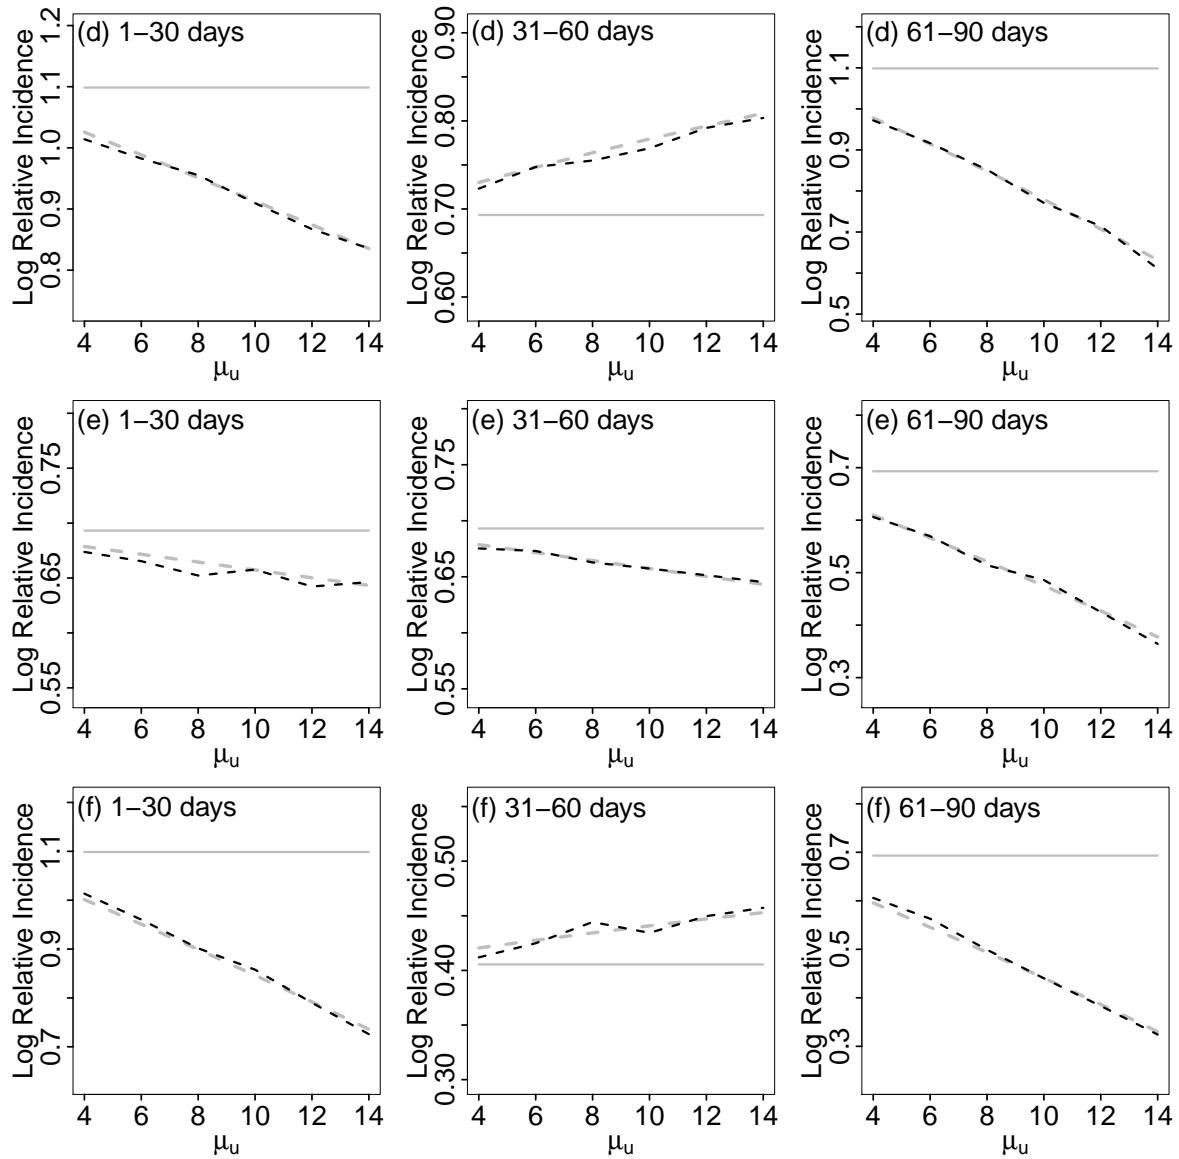

Figure 6: Characterization of bias for gamma distributed measurement error for risk/effect patterns (d)-(f). Bias for true patterns of log relative incidence  $\beta$  (indicated by horizontal lines) over three risk periods. Dashed black curves denote naive case series estimates ignoring measurement error, which targets  $\beta^*$  (dashed gray curves) instead of  $\beta$ . Given are averages over 200 simulated data sets.
